# Supplementary material for: Erratum to: Beninese children with cerebral malaria do not develop humoral immunity against the IT4-VAR19-DC8 PfEMP1 variant linked to EPCR and brain endothelial binding
Source: Springer Nature journal article supplement (doi:10.1186/s12936-015-1061-0), 2016-01-11

# Supplementary Figure 1

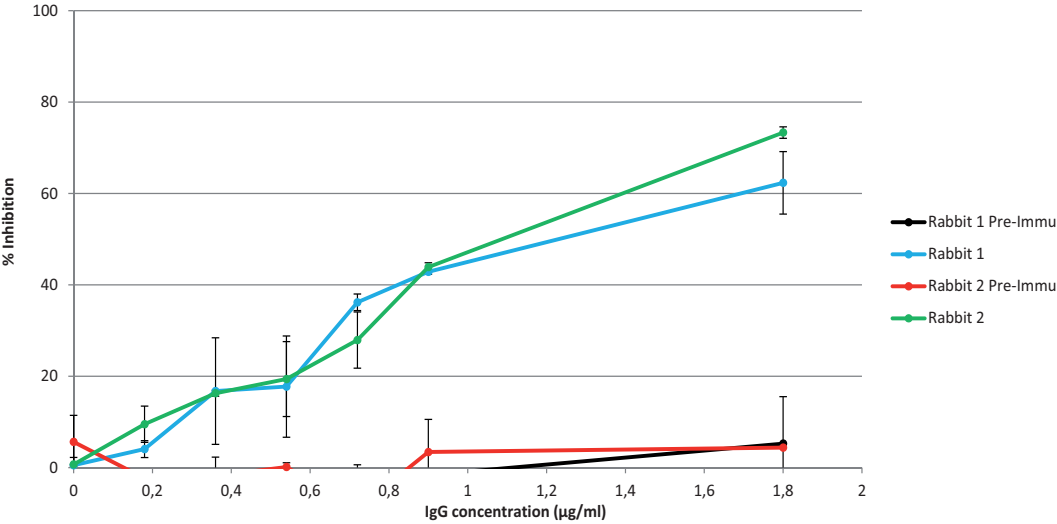

Supplement: MOESM2 [file 9761988]
